# Supplementary material
Source: bioRxiv or medRxiv preprint supplement (https://medrxiv.org/highwire/filestream/68309/field_highwire_adjunct_files/1/19001925-2.pdf)
Supplement: Supplementary file [file 19001925-2.pdf]

Figure S2. Volcano plots differentially methylated sites in breast milk according to breast source cancer status

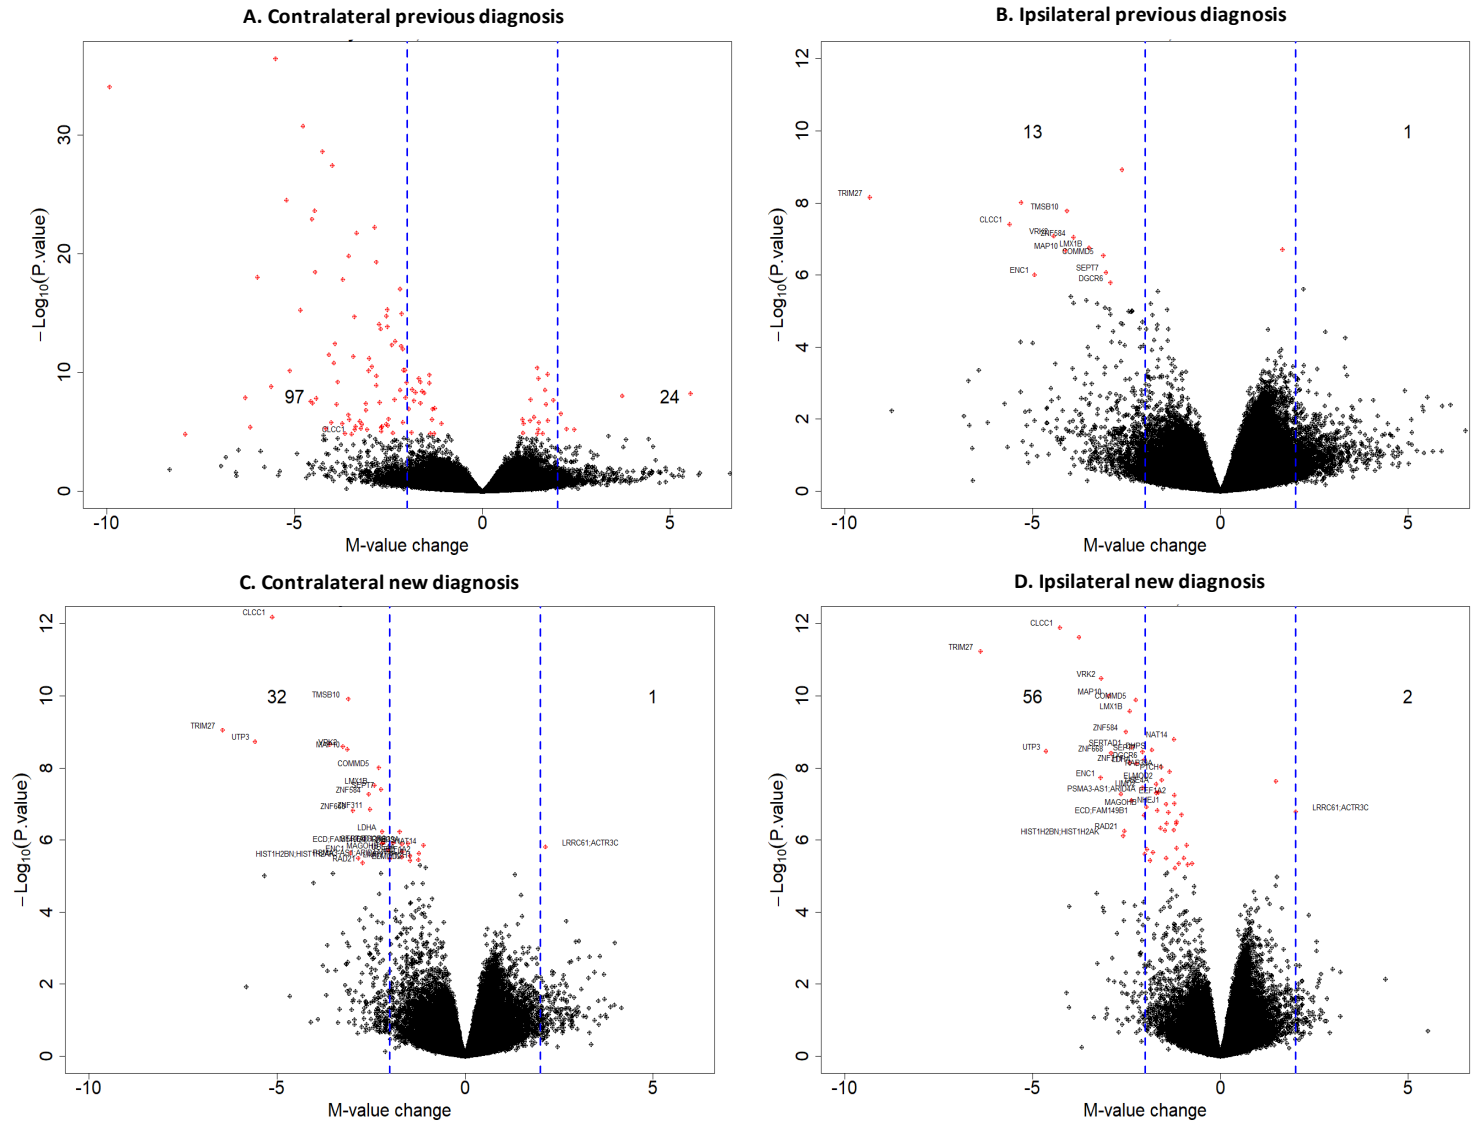

Note: In red those CpGs that were differentially methylated ( $q\text{-value} < 0.05$ ), the bold numbers within the figures correspond to the total number of hypomethylated and hypermethylated significant CpGs. Gene names were added to those CpG sites that overlapped with
